# Supplementary material for: Facilitated dynamics of an active polymer in 2D crowded environments with obstacles
Source: Royal Society of Chemistry journal article supplement (doi:10.1039/d2sm00974a), 2022-01-01
Supplement: d2sm00974a6.pdf [file d2sm00974a6.pdf]

Supplemental Materials for  
 “Facilitated Dynamics of an Active Polymer in 2D Crowded Environments with  
 Obstacles”

Song Wu, Jia-Xiang Li,\* and Qun-Li Lei†

National Laboratory of Solid State Microstructures and School of Physics, Collaborative Innovation  
 Center of Advanced Microstructures, Nanjing University, Nanjing 210093, P. R. China

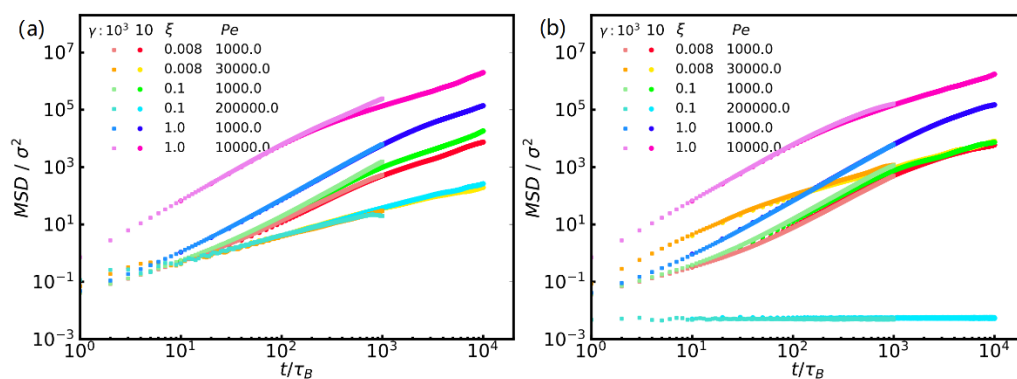

Fig. S1. Mean squared displacement of the center-of-mass (MSD) of active polymer as a function time  $t$  under different friction conditions ( $\gamma$ ) exhibit similar curves in (a) free space and (b) crowded environments.

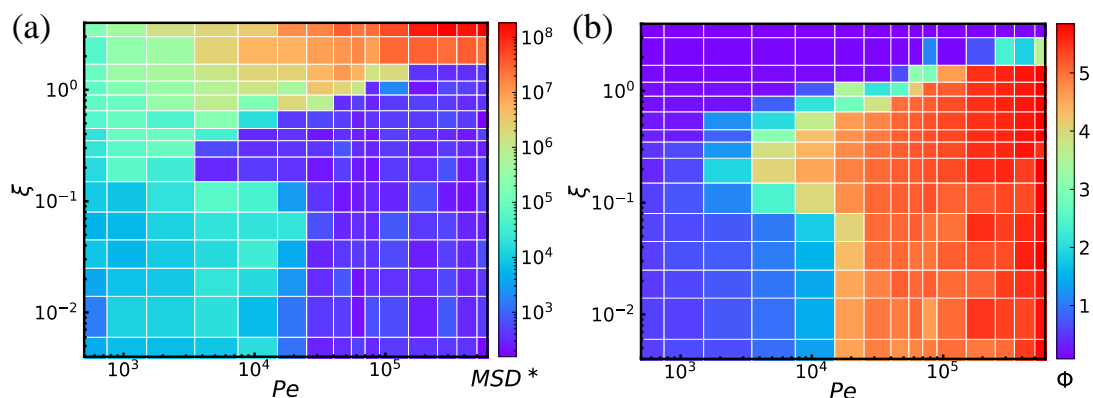

Fig. S2. Phase diagram in  $\xi - Pe$  plane for active polymer in free space, depicted by (a)  $MSD^*$  and (b)  $\Phi$ .

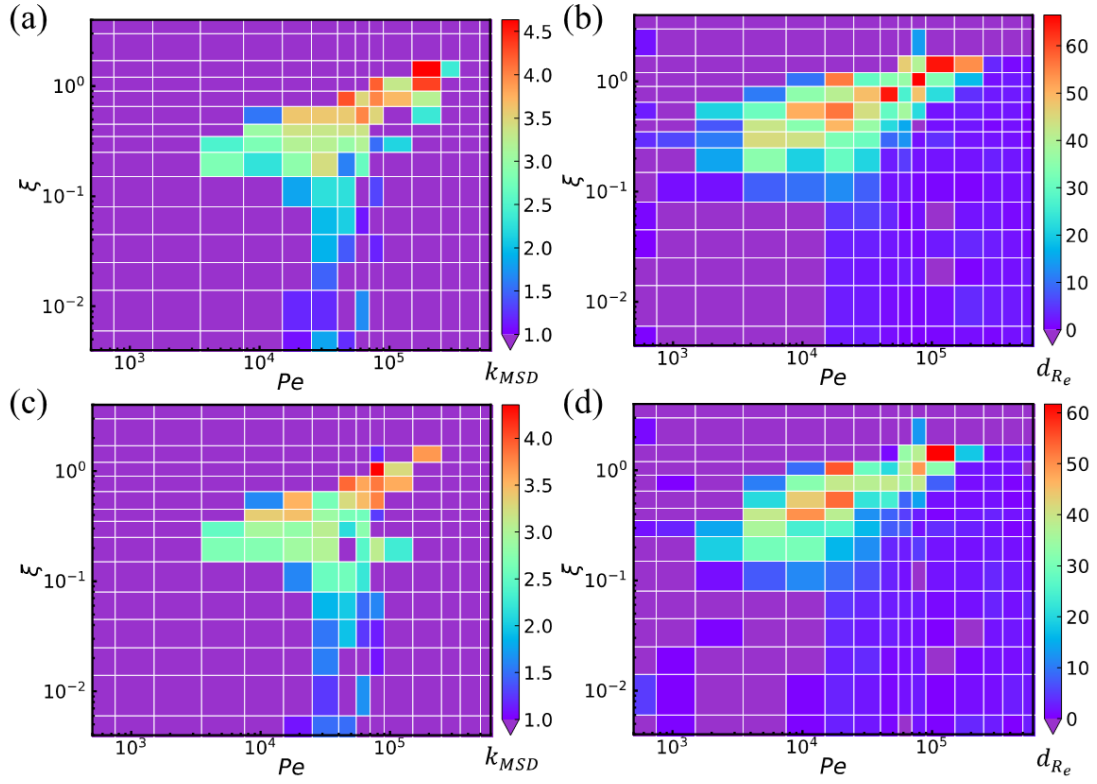

Fig. S3. Phase diagram in  $\xi - Pe$  plane for active polymer in crowded environment with obstacle packing fraction of (a, b)  $\phi = 0.07065$  and (c, d)  $\phi = 0.1256$ , depicted by (a, c)  $k_{MSD}$ \* and (b, d)  $d_{Re}$ .

\* Electronic address: plummmm@nju.edu.cn

† Electronic address: lql@nju.edu.cn
